# Supplementary material for: Pholiota nameko Polysaccharides Protect against Ultraviolet A-Induced Photoaging by Regulating Matrix Metalloproteinases in Human Dermal Fibroblasts
Source: MDPI journal article supplement (doi:10.3390/antiox11040739), 2022-04-08
Supplement: s1 [file s1]

## Supplementary Materials

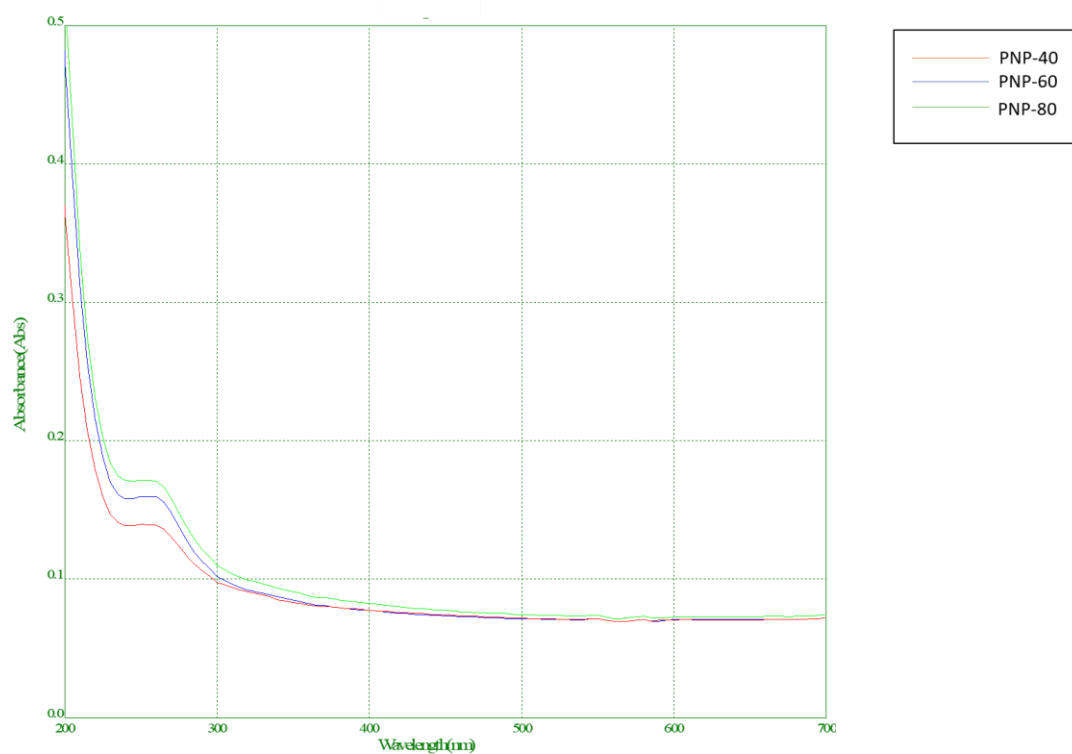

**Figure S1.** Ultraviolet–visible absorption spectra of PNP-40, PNP-60, and PNP-80.

**Table S1.** Assignment of  $^1\text{H}$  and  $^{13}\text{C}$  NMR spectra for PNP-80.

| Peak of C spectrum | Chemical shift of C spectrum(ppm) | Peak of H spectrum | Chemical shift of H spectrum(ppm) |
|--------------------|-----------------------------------|--------------------|-----------------------------------|
| A                  | 20                                | a                  | 1.23                              |
|                    |                                   | b                  | 1.24                              |
| B                  | 60.75                             | f                  | 3.62                              |
|                    |                                   | h                  | 3.73                              |
| C                  | 68                                | i                  | 4.07                              |
|                    |                                   | j                  | 4.09                              |
| D                  | 70                                | c                  | 3.3                               |
| E                  | 71                                | d                  | 3.4                               |
|                    |                                   | e                  | 3.5                               |
| F                  | 72                                | g                  | 3.7                               |
| G                  | 93.45                             | k                  | 5.08                              |
| H                  | 181.3                             |                    |                                   |

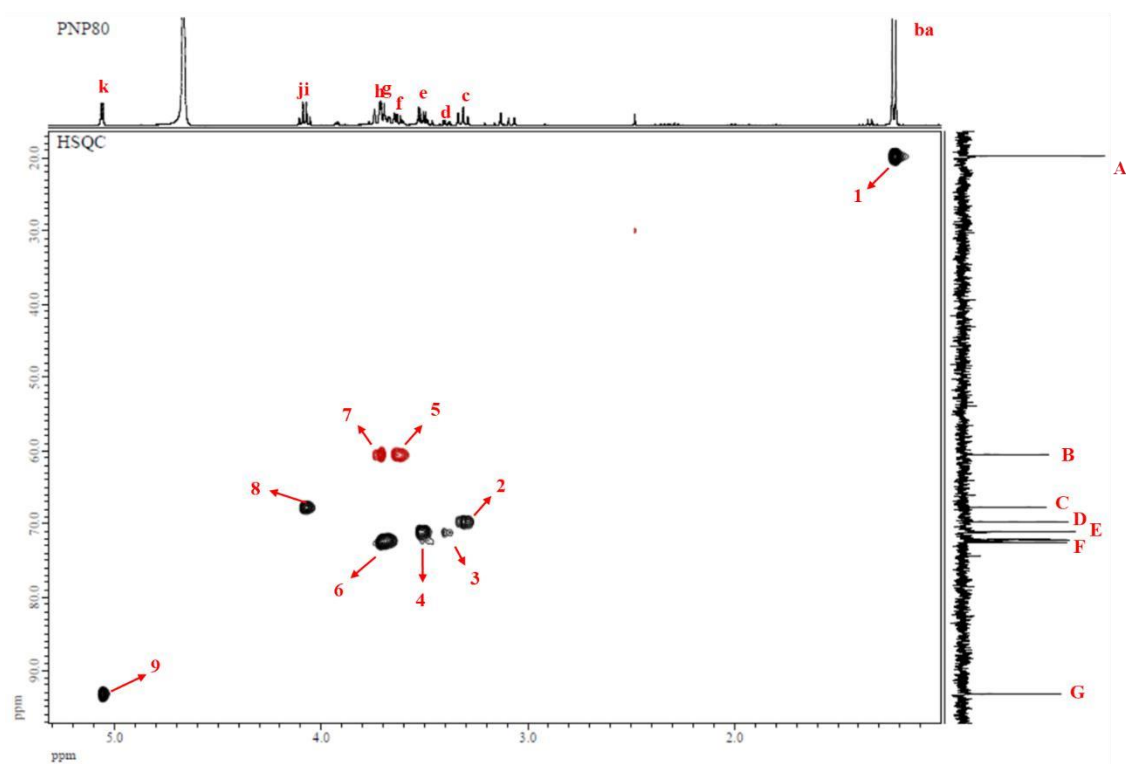

Figure S2. The HSQC spectra of PNP-80.

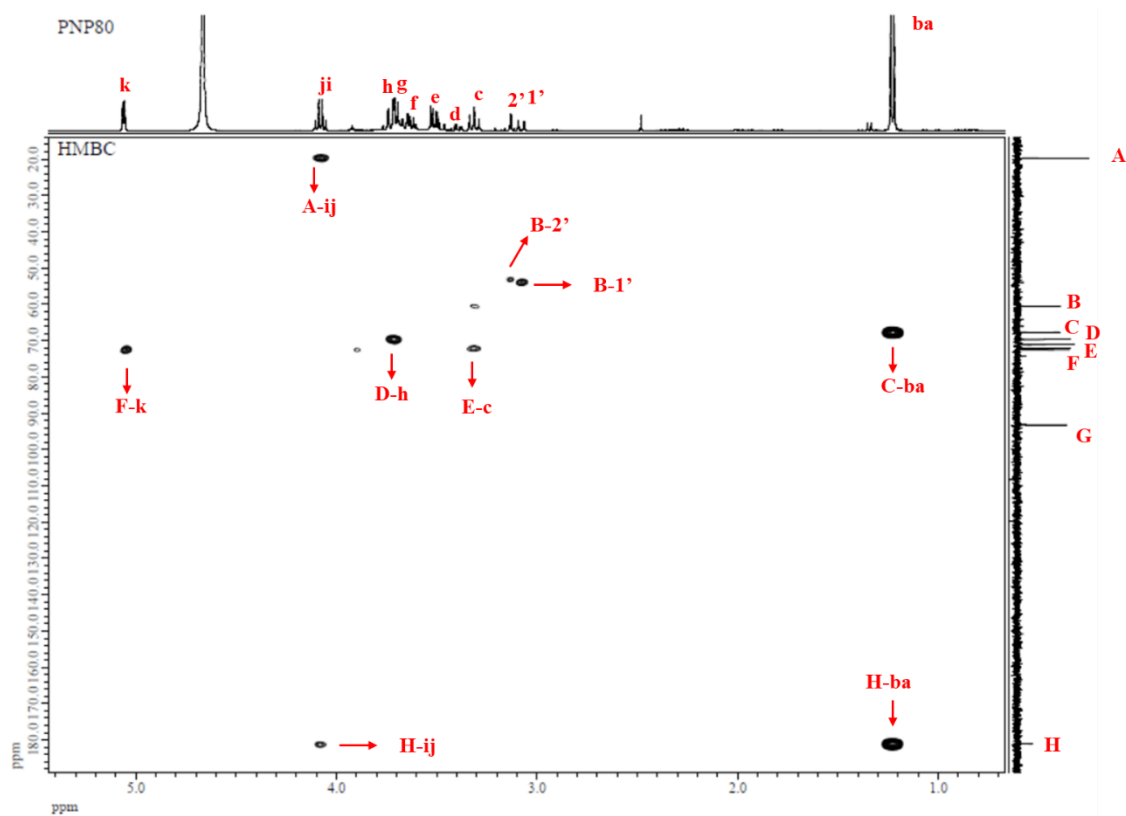

Figure S3. The HMBC spectra of PNP-80.

20210710-2021PNP40

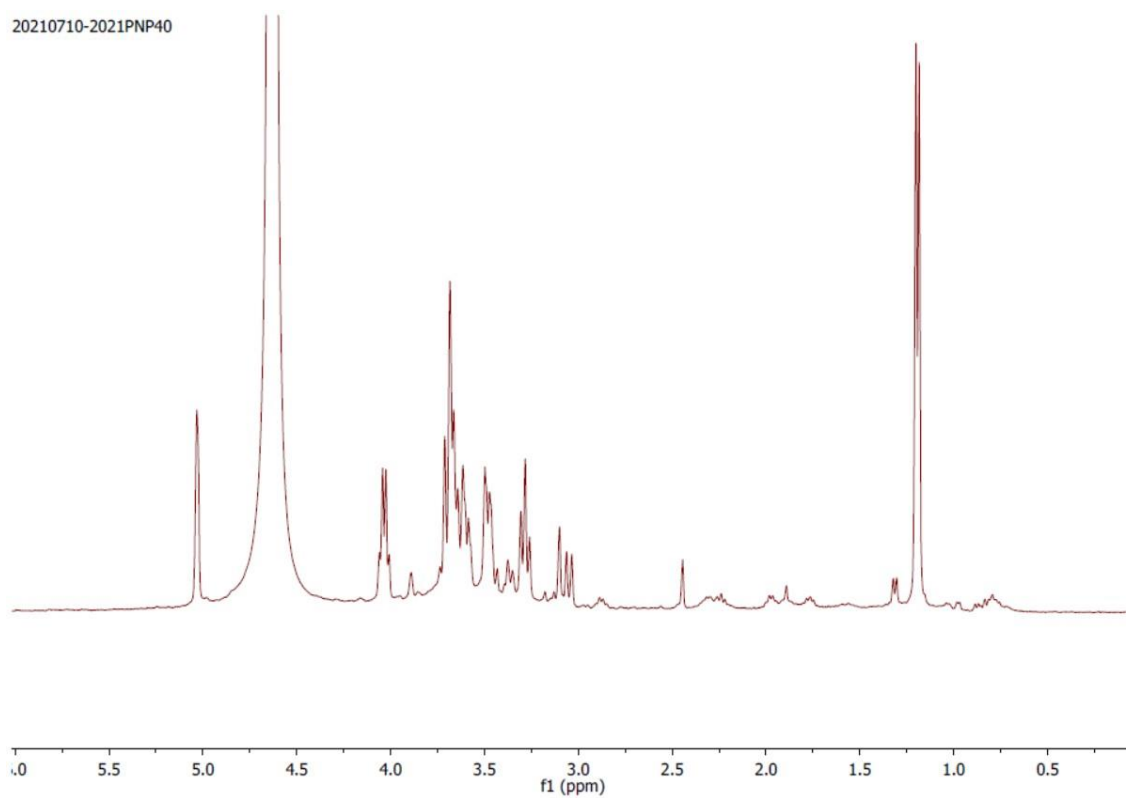

Figure S4. <sup>1</sup>H NMR spectroscopy of PNP-40.

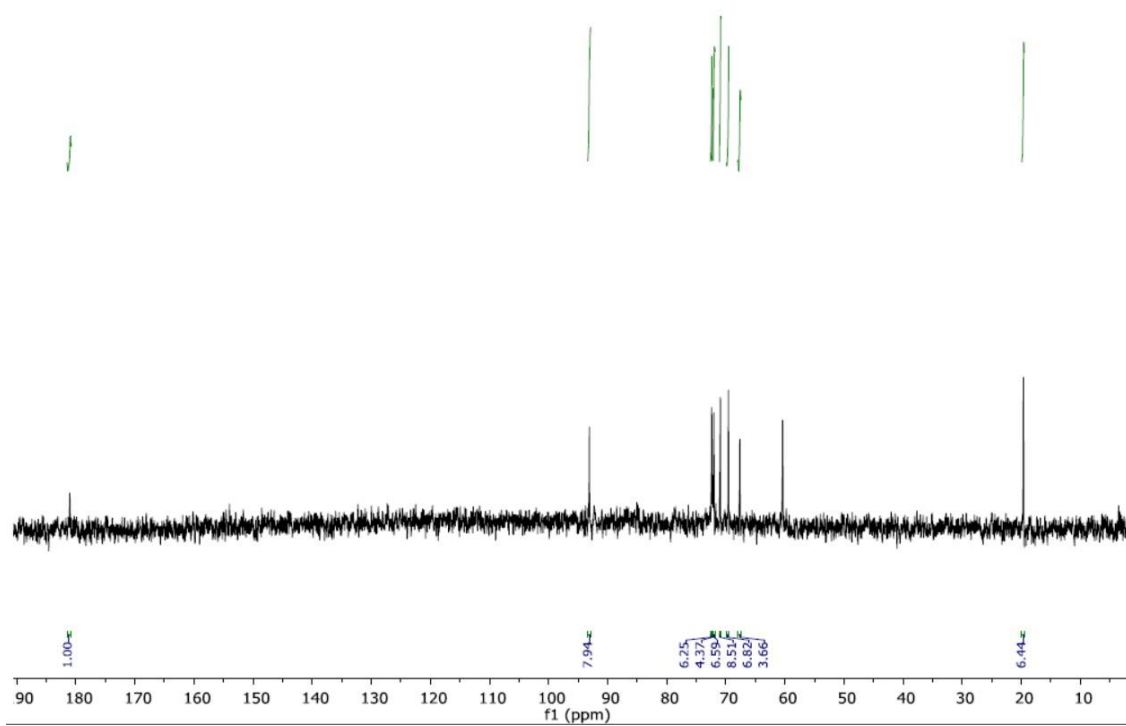

Figure S5. <sup>13</sup>C NMR spectroscopy of PNP-40.

20210709-2021PNP60

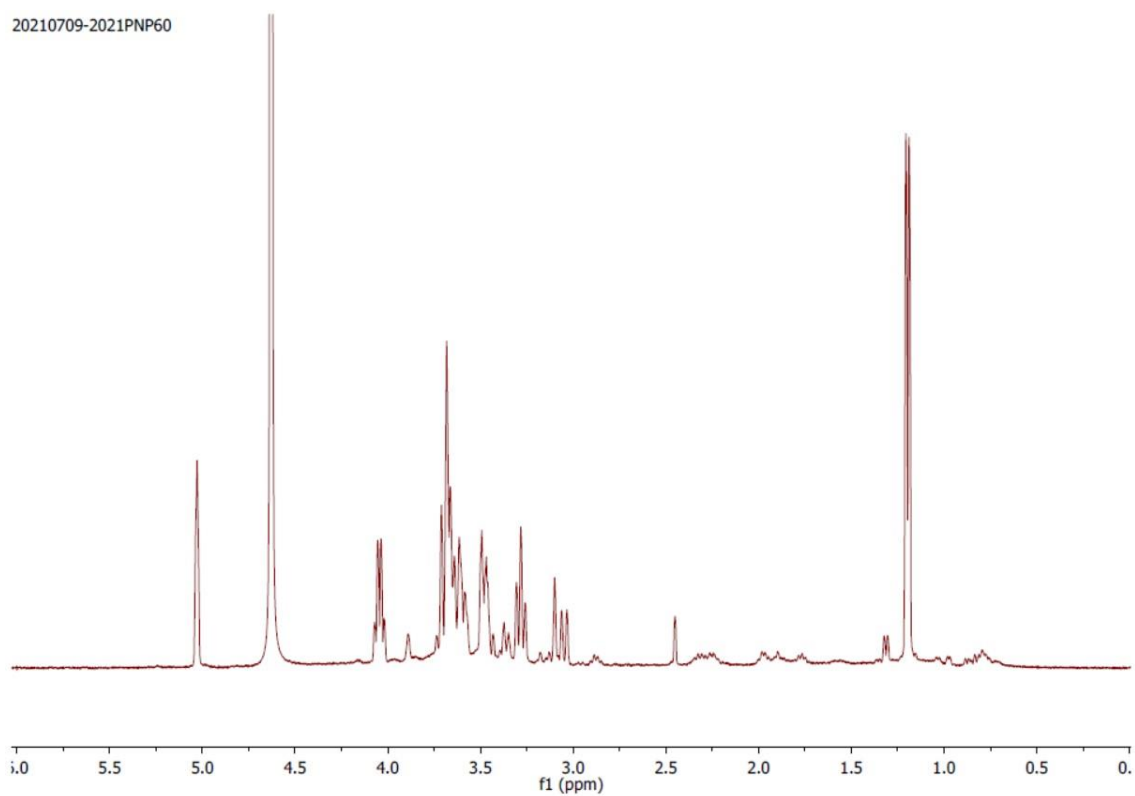

Figure S6. <sup>1</sup>H NMR spectroscopy of PNP-60.

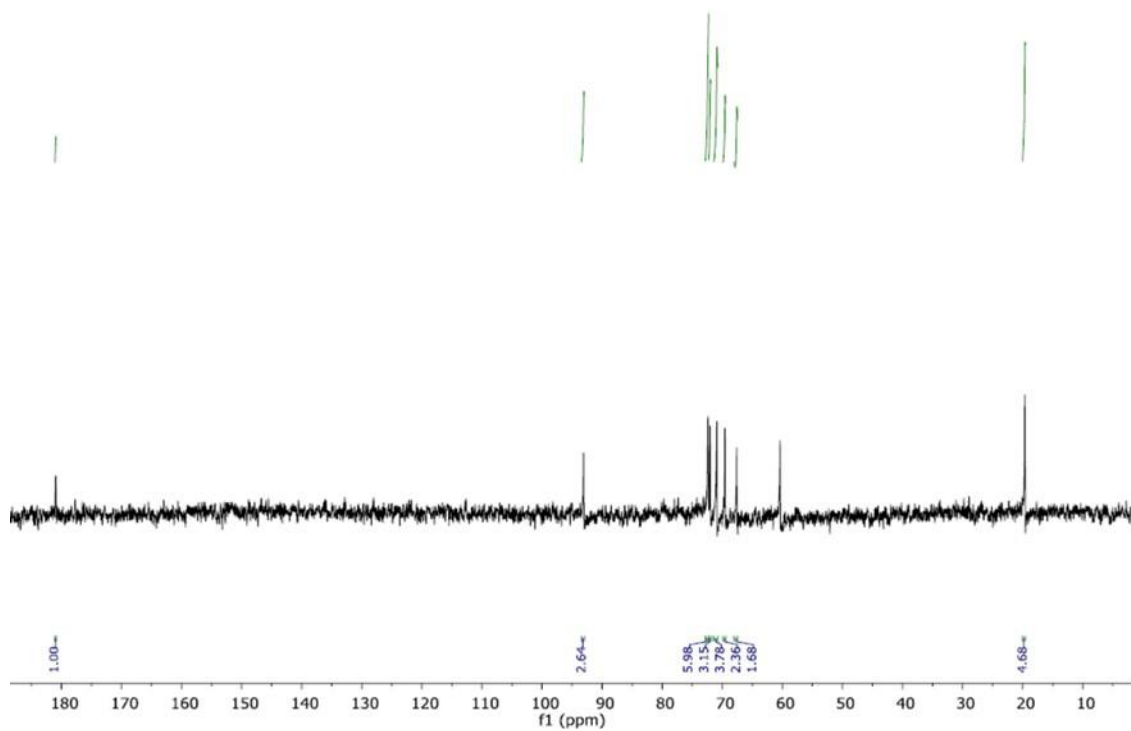

Figure S7: <sup>13</sup>C NMR spectroscopy of PNP-60
